# Supplementary material
Source: MDPI journal article supplement (https://www.mdpi.com/2673-4931/8/1/8)

# Long-term changes in aerosol loading and observed impacts on radiative budget over Middle East

**B. Dayanandan<sup>1</sup>, Piyushkumar N. Patel<sup>2,3</sup>, Pravash Tiwari<sup>4</sup>, Issa Al-Amri<sup>5</sup>,  
Smitha T.T<sup>1</sup>, Humaid Al Badi<sup>7</sup>, Khamis Al-Riyami<sup>8</sup>**

*<sup>1</sup>Department of Mathematical and Physical Sciences, College of Arts and Science, University of Nizwa, Oman*

*<sup>2</sup>NASA Jet Propulsion Laboratory, California Institute of Technology, Pasadena, CA, USA*

*<sup>3</sup>Universities Space Research Association, Columbia, MD, USA,*

*<sup>4</sup>House no. 71, Sukubahal Galli, Thamel, Kathmandu, Nepal*

*<sup>5</sup>Department of Biological Sciences and Chemistry, College of Arts and Science, University of Nizwa, Oman*

*<sup>6</sup>Oman Meteorological Department of Muscat International Airport, Oman*

*<sup>7</sup>Natural and medical Sciences Research Centre, University of Nizwa, Oman*

# Background and Motivation

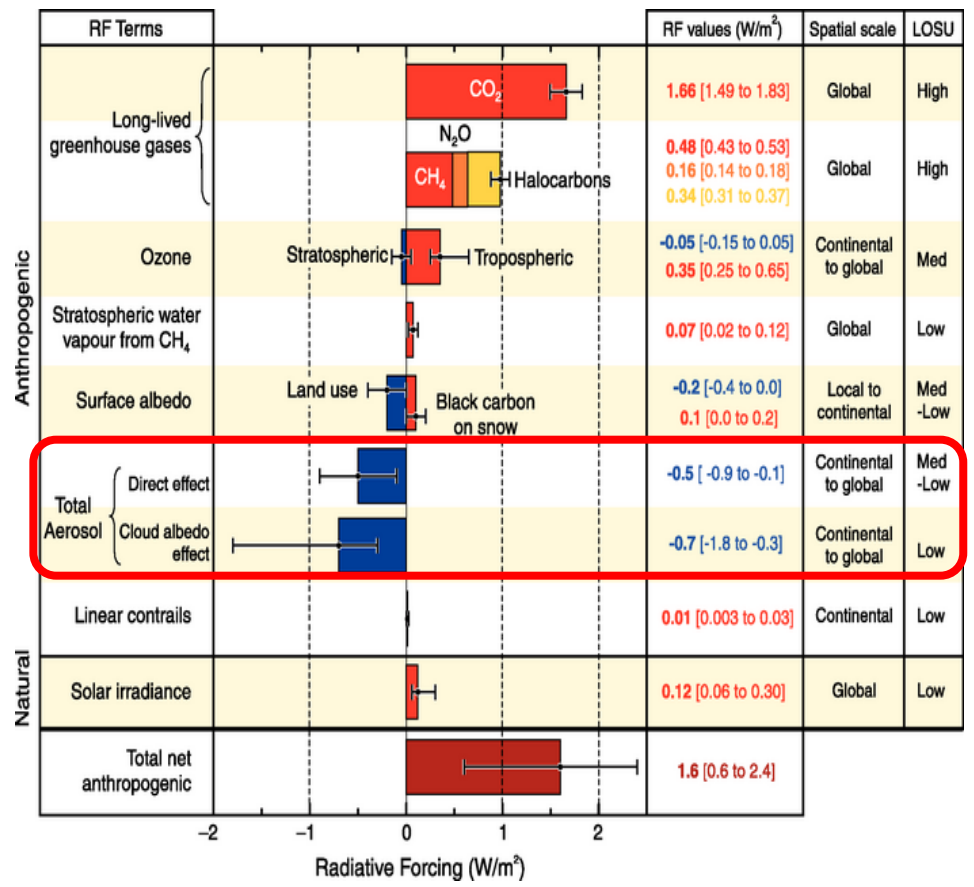

IPCC, AR4, (2007)

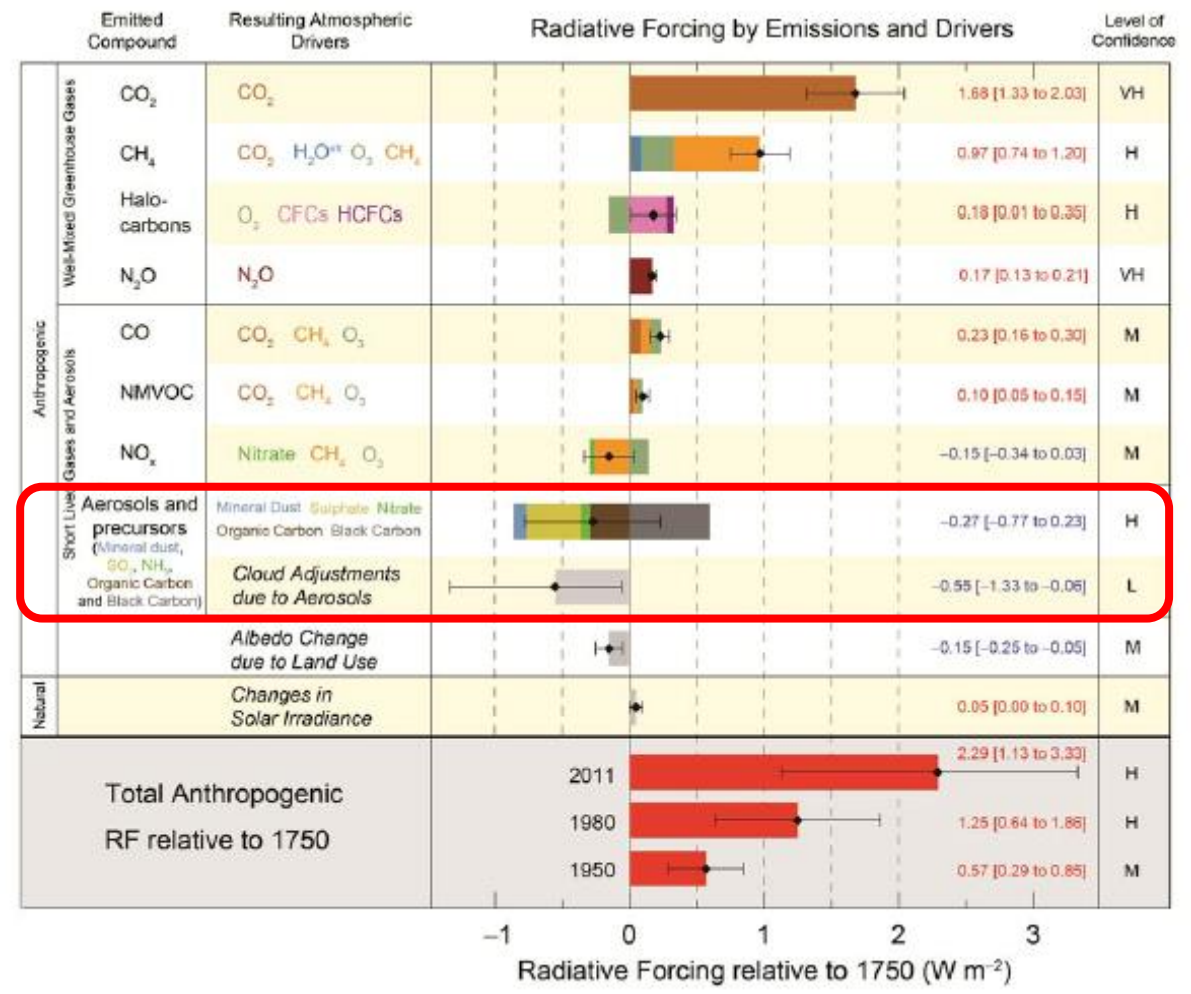

IPCC, AR5, (2013)

## Middle East – Aerosol and Air pollution Overview

- The Middle East (ME) and the adjacent Mediterranean area have been identified as the most *important hotspot for climate change*.
- Located in the *center of the northern subtropical dust belt*, the Arabian Desert is the *third-largest (after the Sahara and the East Asian deserts) region of dust generation*, and this dust plays an important role in regional climate control
- The Natural *dust aerosol is very well supplemented with local anthropogenic emissions*
- The ME aerosols have regional as well as global influence

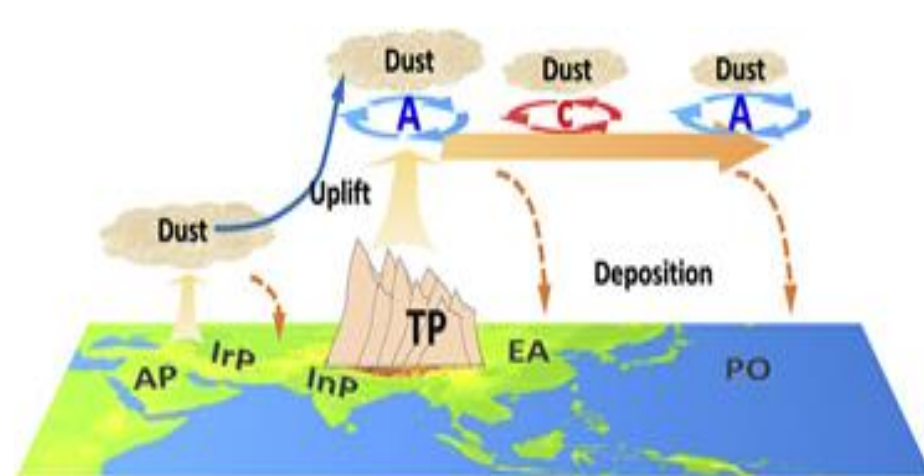

*Xu et al., (2018)*

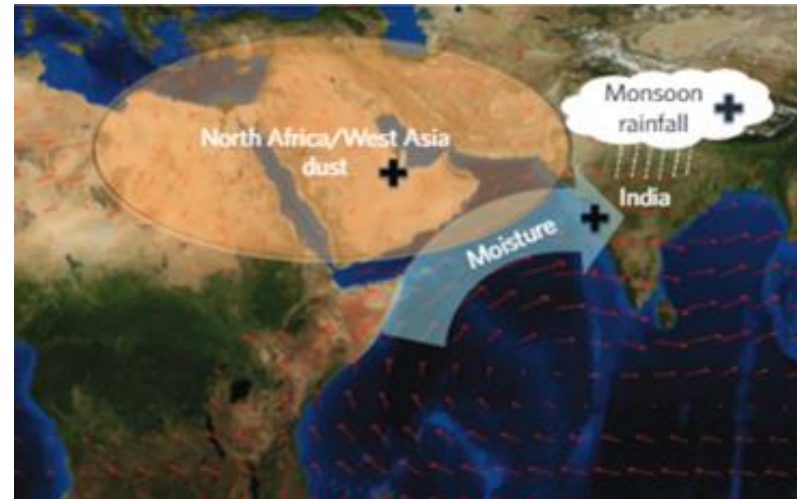

*Vinoj et al., (2014)*

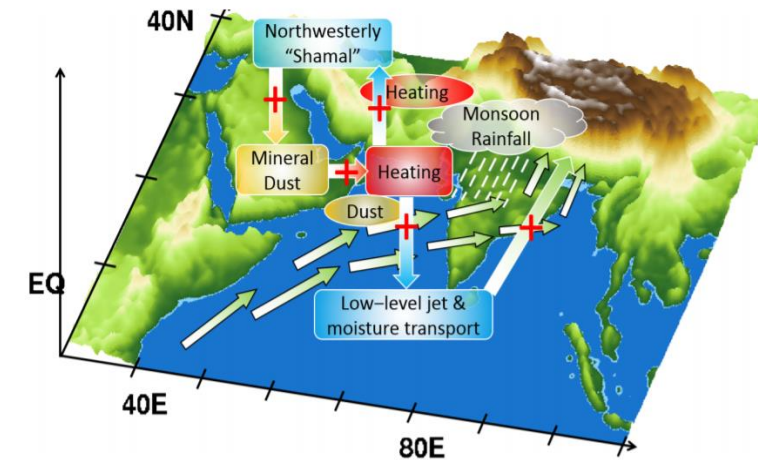

*Jin et al., (2015)*

## Study Goals

### GAPS

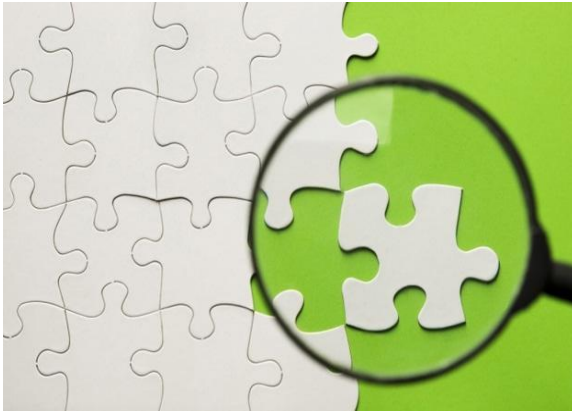

- Till date studies are mostly limited to either site or country specific, and exploring dust storm anatomy
- Comprehensive investigation utilizing combination of different satellites and ground data is still lacking for the entire ME
- Availability of very limited aerosol studies particularly focused on climate perspective over the Middle East.

- A long term aerosol optical depth and aerosol type trend over the ME in the span of 14 years (2005-2018).
- Long term variation in radiative fluxes (surface and atmosphere) and heating rate over the region.
- Explore the interrelation between variation in aerosol optical depth, aerosol type and resultant radiative forcing.

### Study Goals

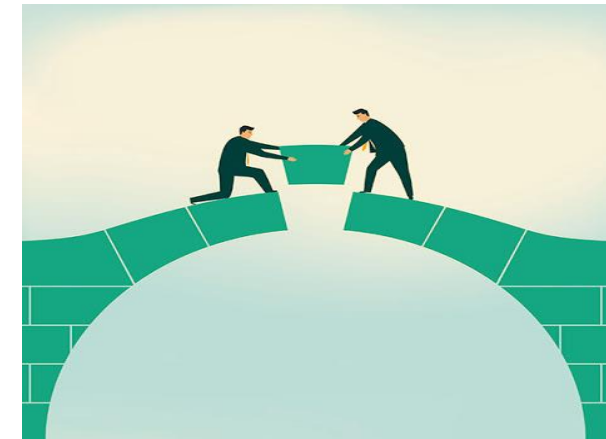

## Data and Method

| <u>Data Source</u>               | <u>Parameters</u>                                                            | <u>Resolution</u>                                                 | <u>Data Used</u>           |
|----------------------------------|------------------------------------------------------------------------------|-------------------------------------------------------------------|----------------------------|
| <b>Satellite Observations</b>    |                                                                              |                                                                   |                            |
| <b>MODIS</b>                     | <b>Aerosol optical Depth (AOD)</b>                                           | 10 km x 10 km                                                     | 2005-2019                  |
| <b>CERES</b>                     | <b>Top-of-the-atmosphere (TOA) radiative flux<br/>Surface SW flux</b>        | 20 km x 20 km                                                     | 2005-2019                  |
| <b>CALIPSO</b>                   | <b>Vertical profile of aerosol extinction coefficients and aerosol types</b> | 5km horizontal<br>30 m vertical                                   | 2006-2019                  |
| <b>Ground-based Measurements</b> |                                                                              |                                                                   |                            |
| <b>AERONET</b>                   | <b>aerosol optical depth</b>                                                 | 15 min. for direct &<br>30 min. for<br>almucantar<br>measurements | Several station over<br>ME |

### MODIS AOD over ME

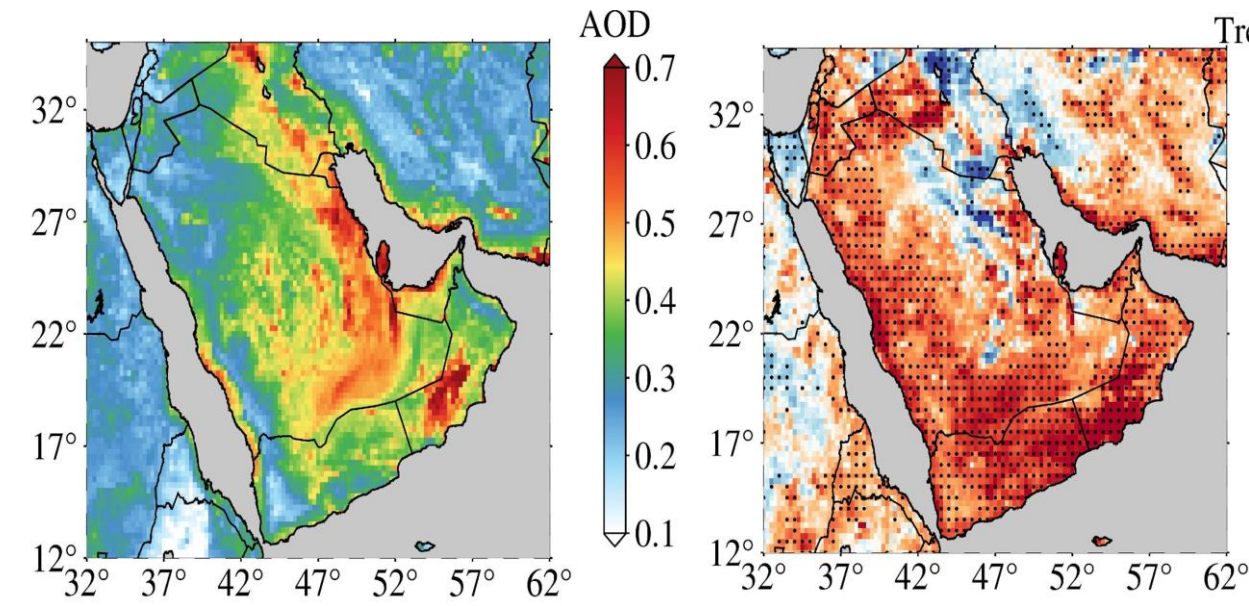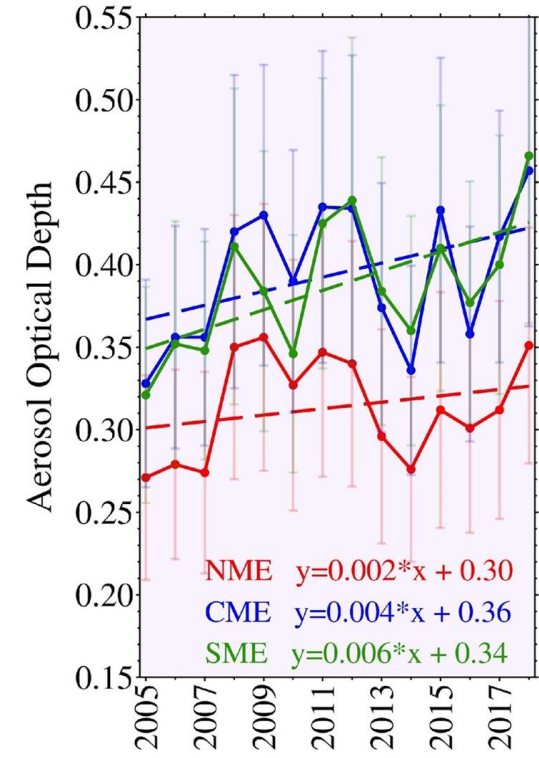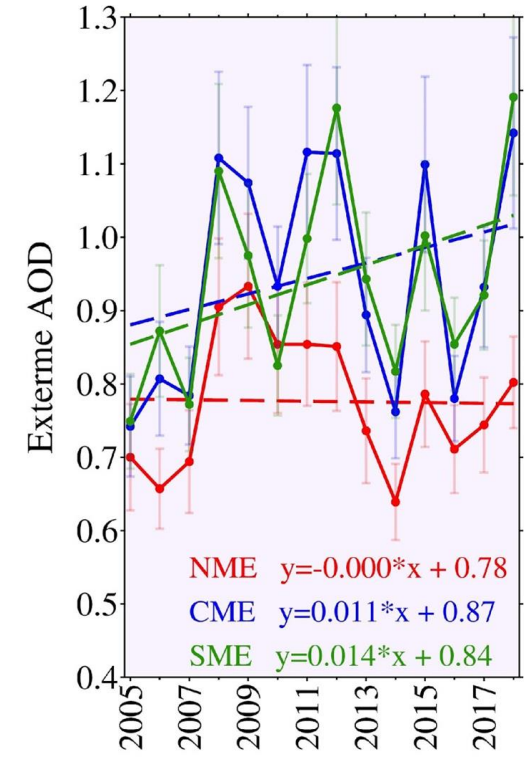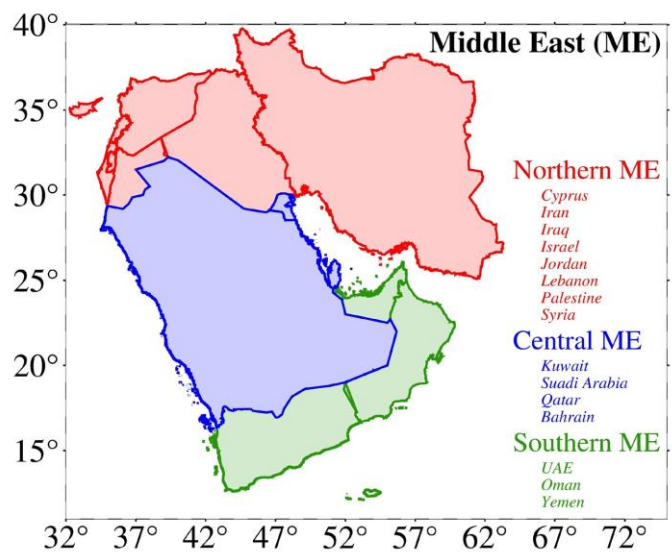

| Region | AOD | Extreme AOD |
|--------|-----|-------------|
| NME    | 10% | -0.1%       |
| CME    | 15% | 17%         |
| SME    | 24% | 25%         |

## MODIS AOD Vs. AERONET AOD

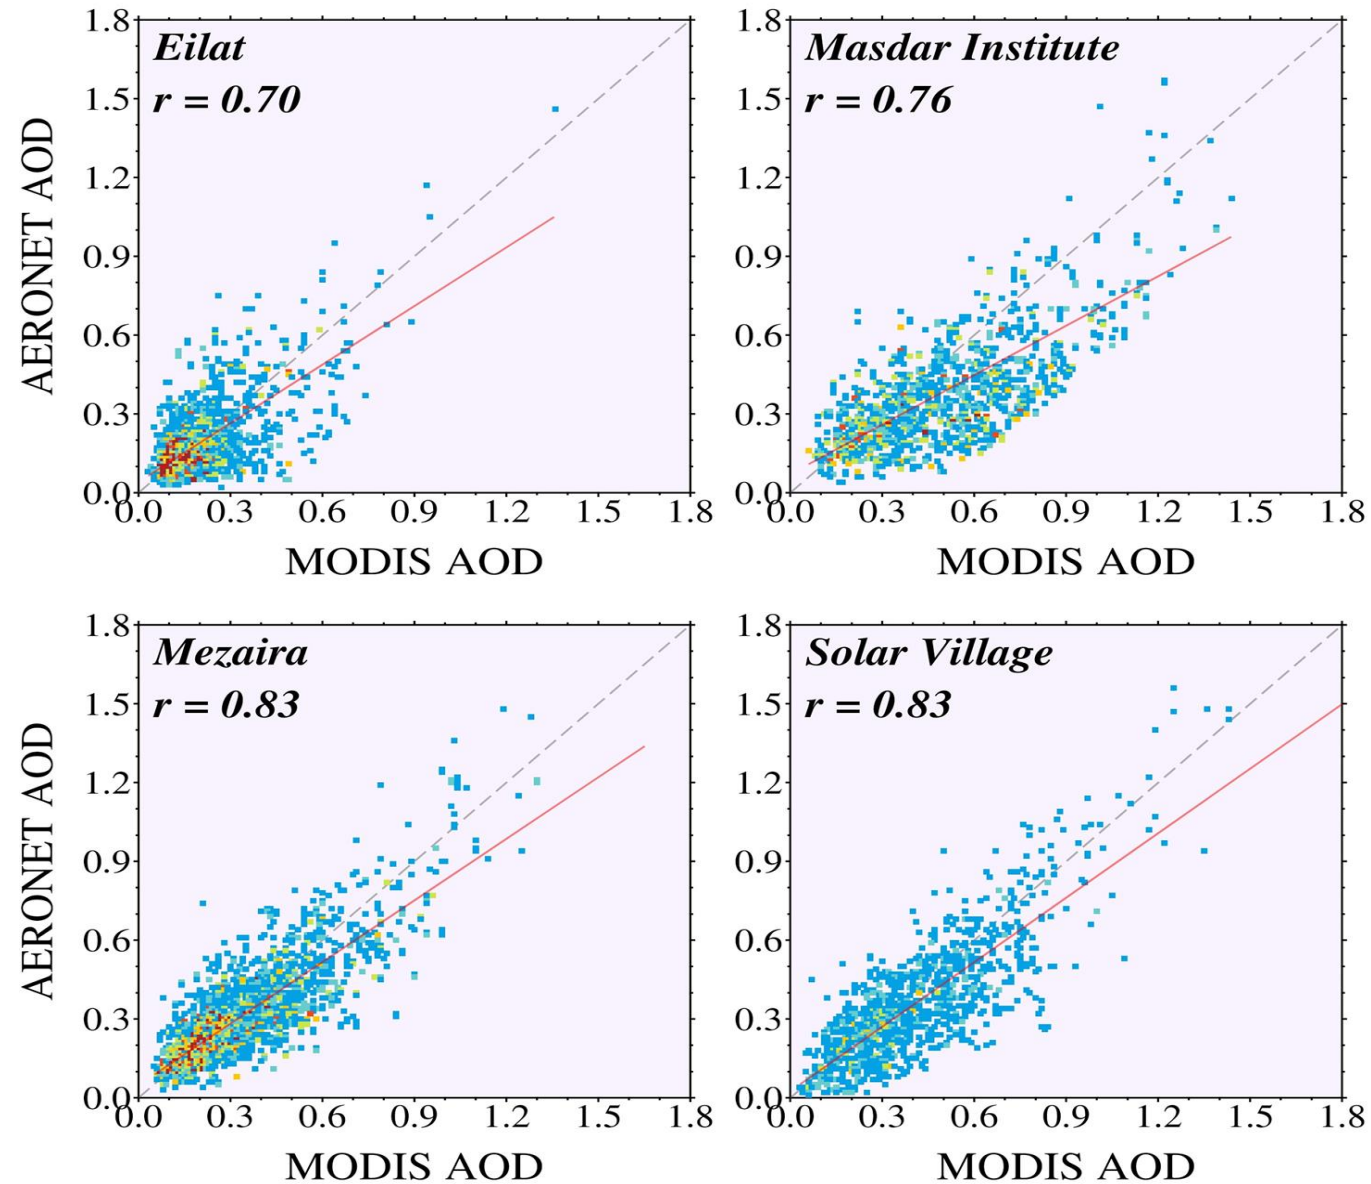

## CALIPSO Extinction Profile and AOD

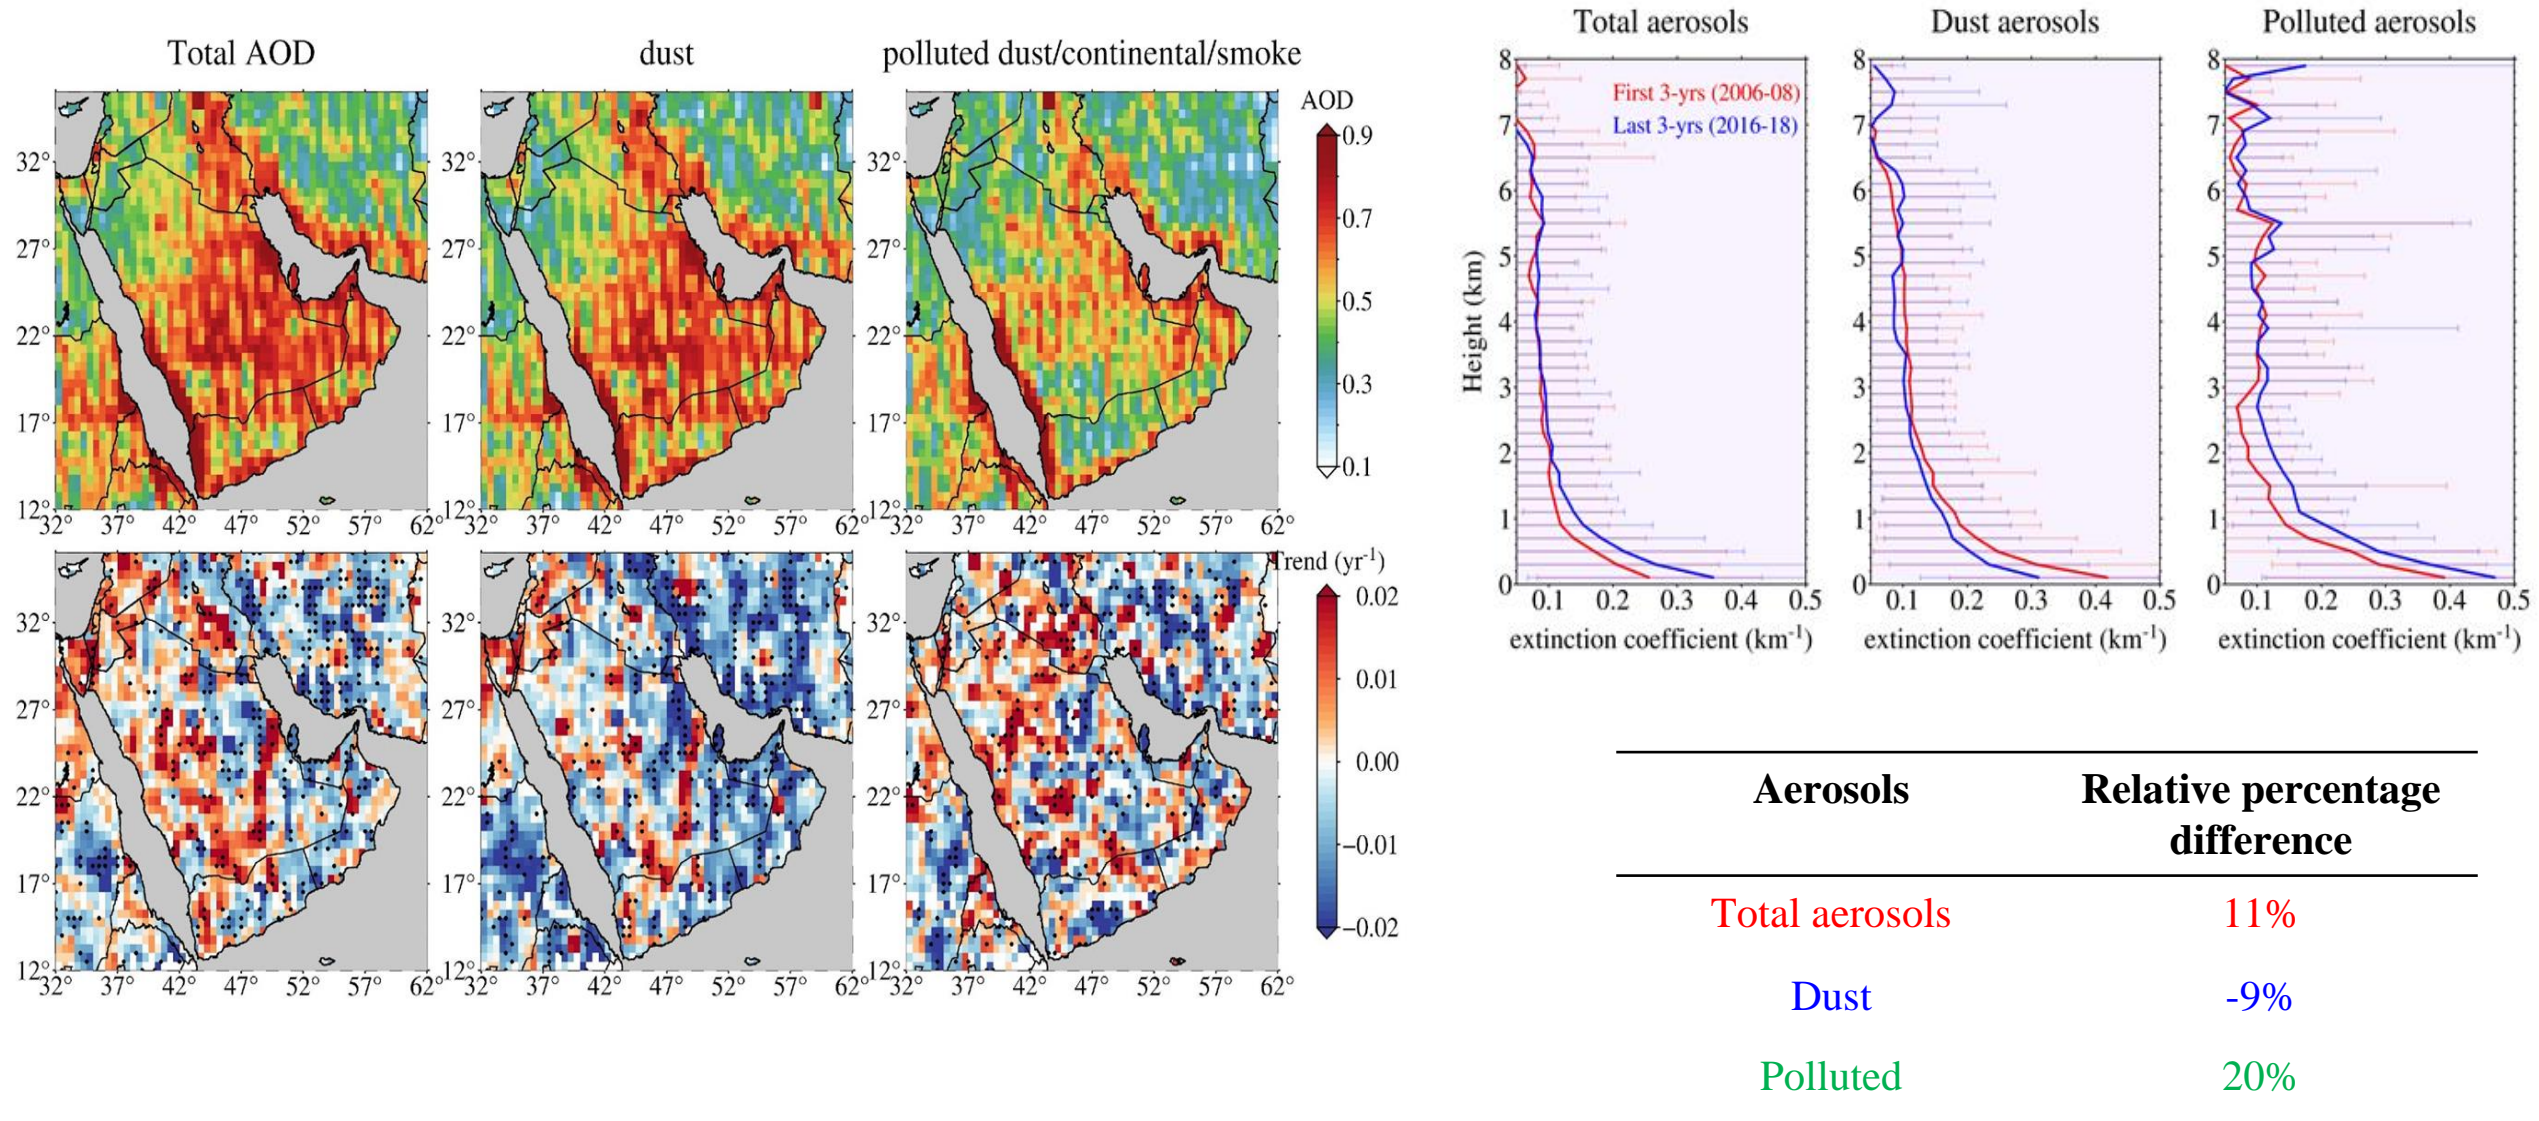



## Surface Flux and Atmospheric Forcing

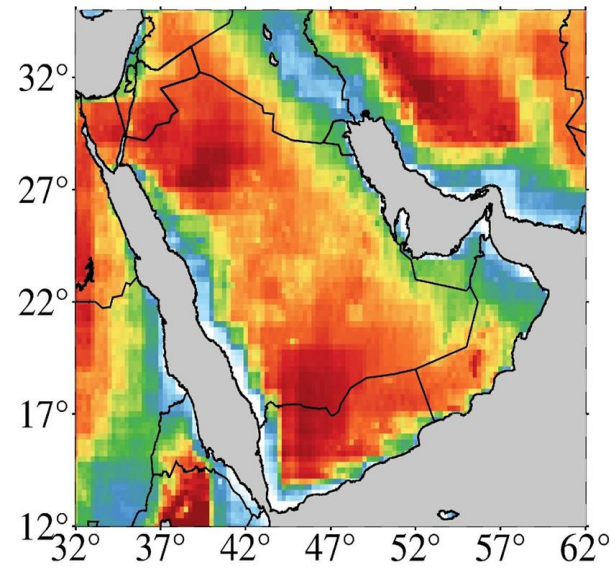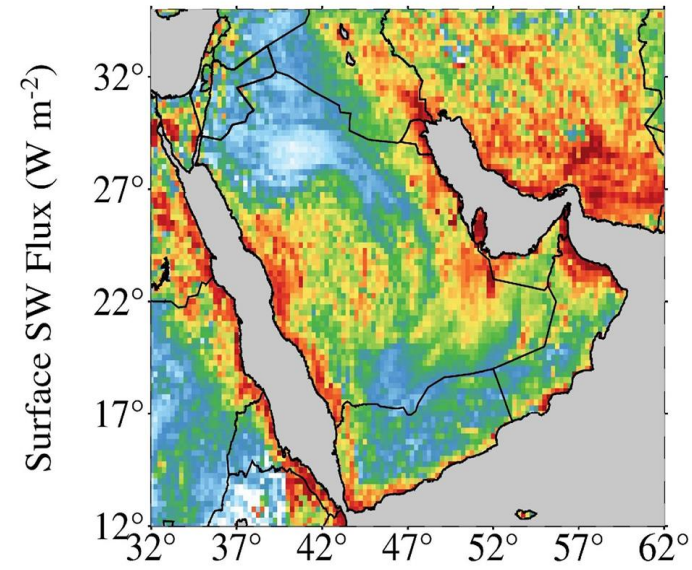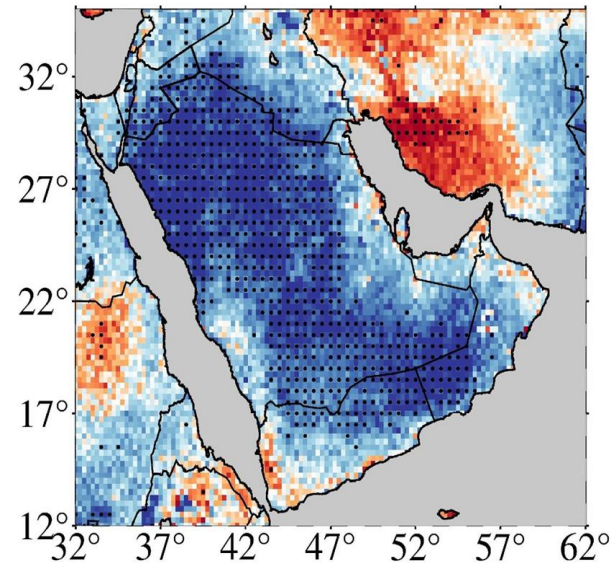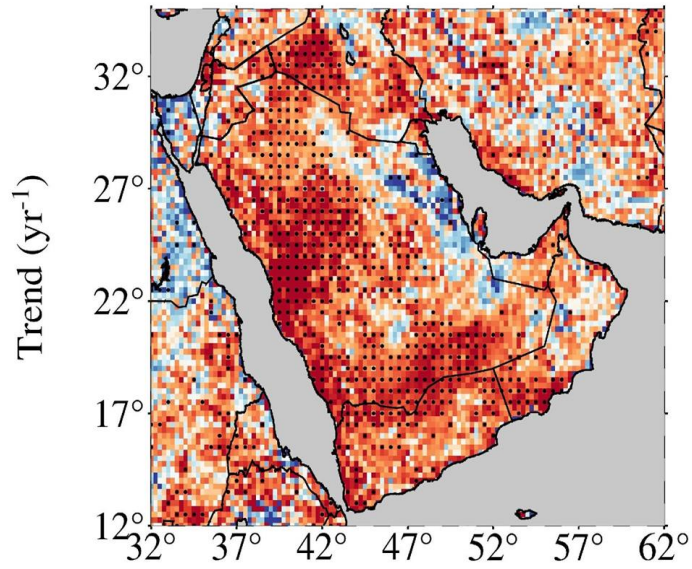

## Surface Flux, Atmospheric Forcing and Heating Rate Trend

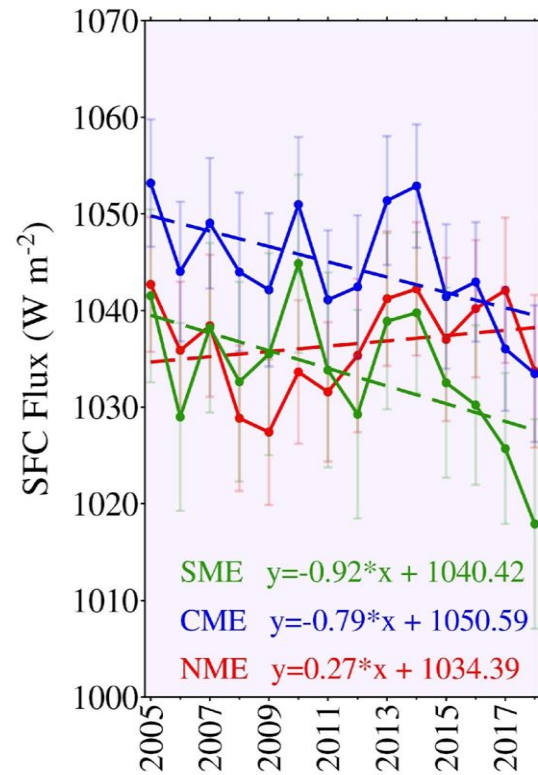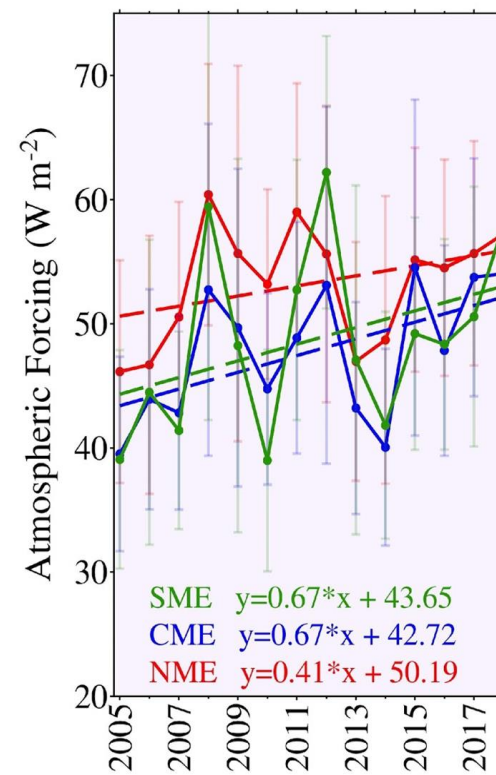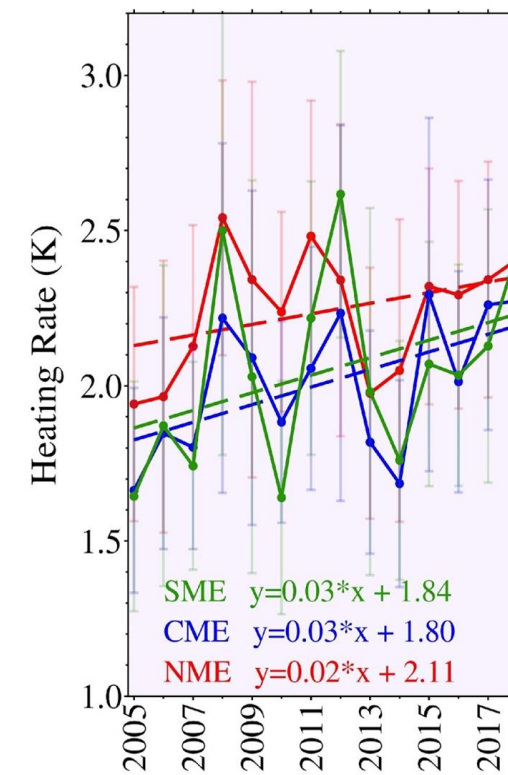

| Region | Surface cooling | Atmospheric warming | Heating Rate |
|--------|-----------------|---------------------|--------------|
| NME    | 1%              | 11%                 | 13%          |
| CME    | 4%              | 21%                 | 23%          |
| SME    | 5%              | 21%                 | 23%          |

## Conclusion

- ✓ Long-term satellite observations reveal an *overall increase in AOD and extreme AOD trends* over the Middle East (ME). The regional analysis shows the highest increase in AOD trend over Southern ME (24%) followed by Central ME (15%) and Northern ME (10%). The validation of MODIS AOD showed good agreement against AERONET AOD, with ~70% of the retrievals falling within the expected error and *high correlation coefficient ( $r > 0.7$ )*.
- ✓ CALIPSO derived AOD agrees well with MODIS AOD over most of ME, with *an overall increasing pattern*. This also reveals a *declining trend of dust aerosols and an increasing trend of polluted aerosols* (polluted dust/polluted continental/smoke) over ME. The vertically-resolved extinction profiles between first (2006-08) and last three years (2016-18) reveal a similar findings.
- ✓ Long-term increase in aerosol loading over ME *enhances the surface cooling ( $\sim -0.7 \text{ W m}^{-2} \text{ per year}$ ) and atmospheric warming ( $\sim 0.55 \text{ W m}^{-2} \text{ per year}$ )* that further *increase the heating rate by  $\sim 0.03 \text{ K per year}$* . The regional analysis reveals that aerosol-induced perturbation in regional radiative budget is more towards Southern ME than Northern ME.
- ✓ Overall, the outcomes of the study show the long-term rise in aerosols over ME, and related conducive regional energy budget, are concerning and in turn provide an opportunity to strengthen mitigation action towards air quality and health assessment. This further provides an critical input for the regional and global climate models.

# Thank You

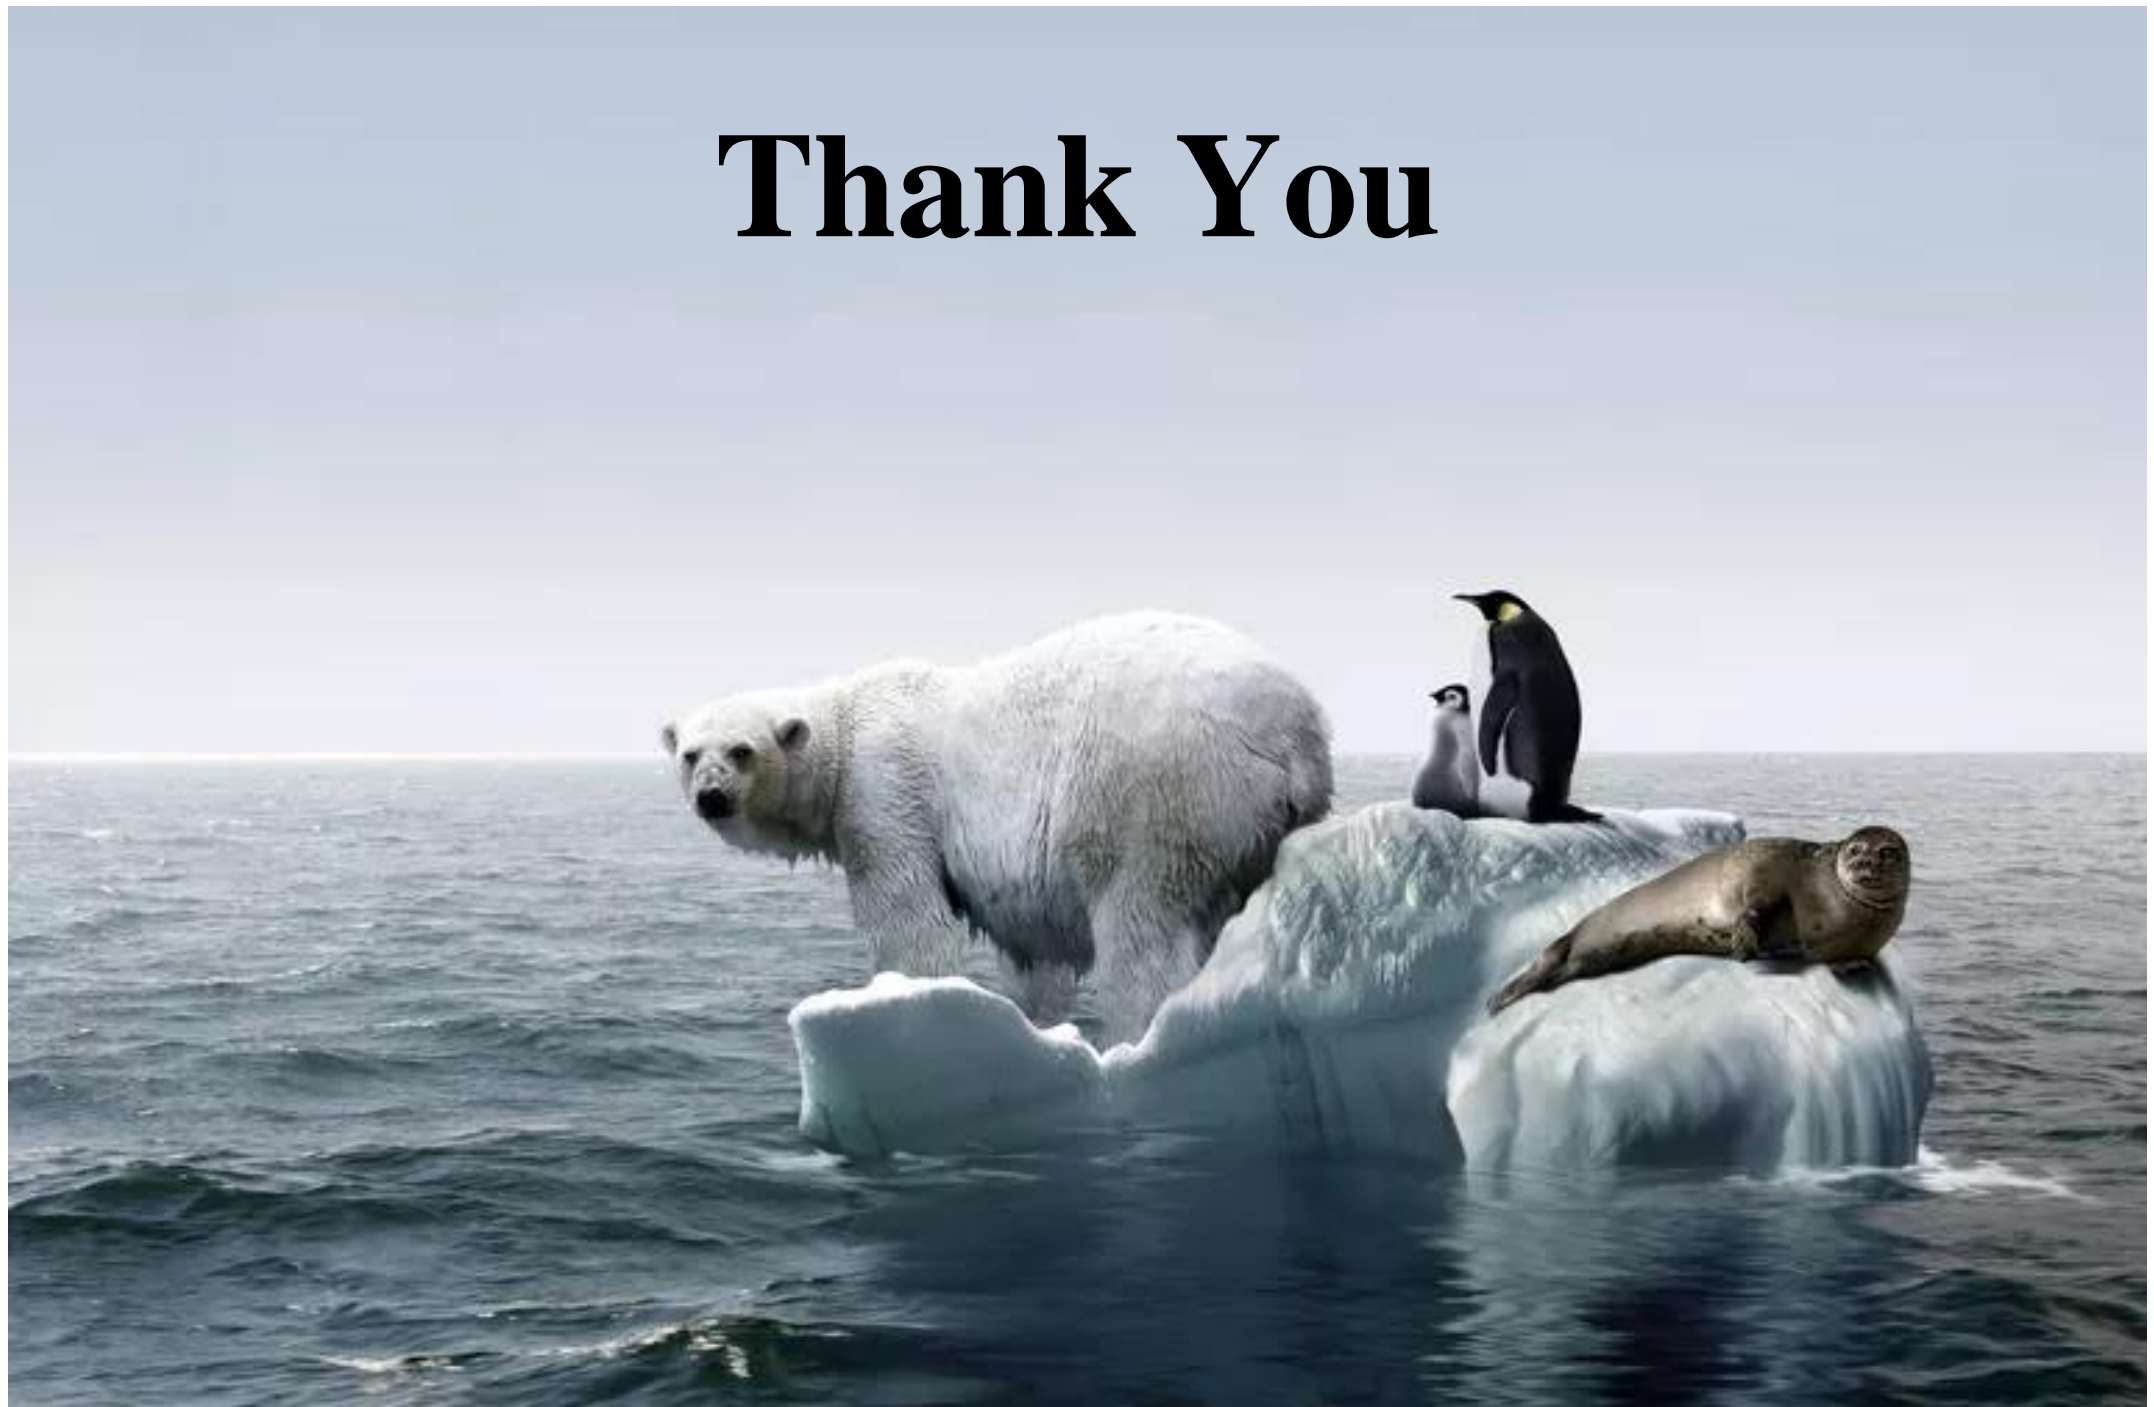

Supplement: s1 [file s1]
